# Supplementary material for: Hydrothermal growth control of ZnSe·N2H4 nanobelts
Source: Royal Society of Chemistry journal article supplement (doi:10.1039/b920023a), 2010-01-01
Supplement: b920023a.pdf [file b920023a.pdf]

## Hydrothermal Growth Control of ZnSe·N<sub>2</sub>H<sub>4</sub> Nanobelts

Jong-Yeob Kim, Mee Rahn Kim, Sun-Young Park, and Du-Jeon Jang\*

### Electronic Supplementary Information (ESI)

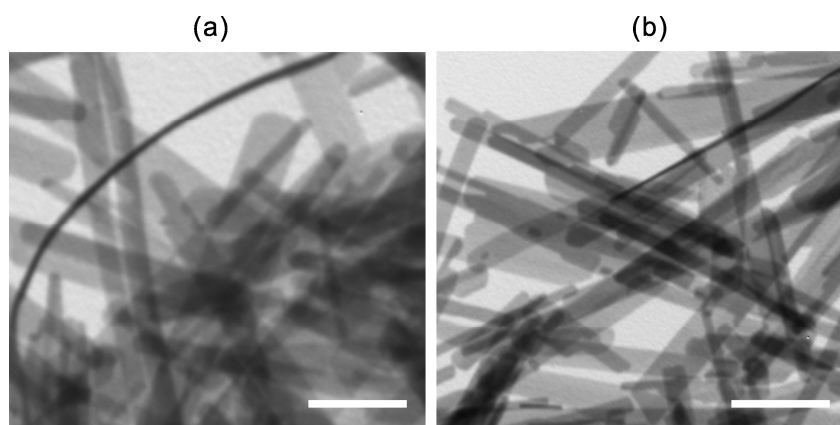

Fig. S1 TEM images of ZnSe·N<sub>2</sub>H<sub>4</sub> nanobelts grown at 180 °C for 6 h using [Se]-to-[ZnCl<sub>2</sub>] ratios of 1.5 (a) and 0.67 (b). Each scale bar indicates 500 nm.

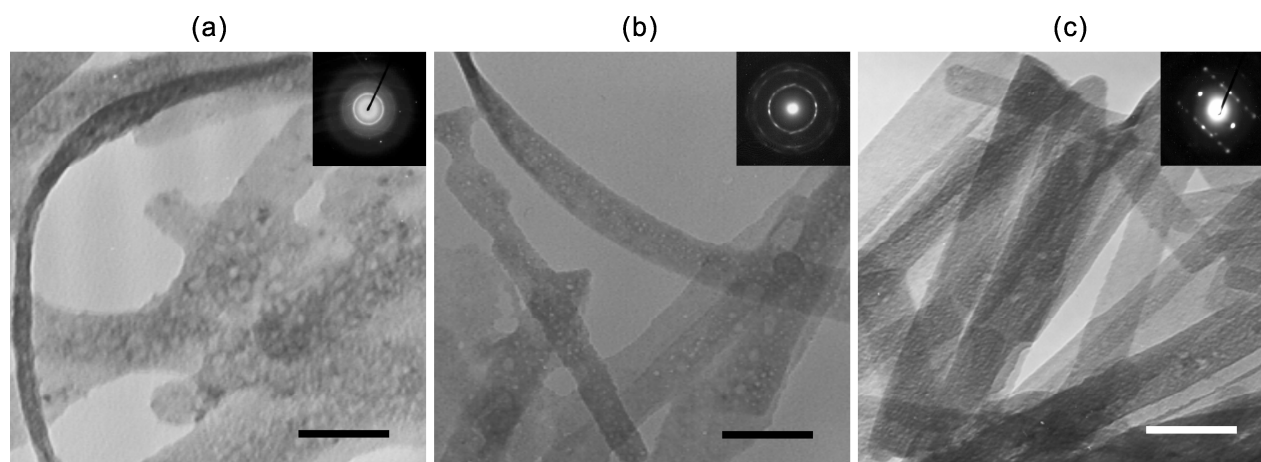

Fig. S2 TEM images and SAED patterns (insets) of ZnSe·N<sub>2</sub>H<sub>4</sub> nanobelts grown for 6 h at 100 °C (a), 140 °C (b), and 180 °C (c) with a [Se]-to-[ZnCl<sub>2</sub>] ratio of 1.0. Each scale bar indicates 200 nm.
